# Supplementary material
Source: HighWire-hosted journal article supplement (https://injuryprevention.bmj.com/highwire/filestream/160429/field_highwire_adjunct_files/1/ip-2023-044887supp002_data_supplement.pdf)
Supplement: ip-2023-044887supp002_data_supplement.pdf [file ip-2023-044887supp002_data_supplement.pdf]

Supplementary File 2 - Full national participation data by all Specific Activities in Active Lives Survey Years 2 and 3.

| Activities                                                                  | November 2016-17 (ALS 2) | November 2017-18 (ALS 3) | ONS MYE-weighted | Annual population estimates for England and Wales |         |         |         |         |         | 6-year total population at risk |
|-----------------------------------------------------------------------------|--------------------------|--------------------------|------------------|---------------------------------------------------|---------|---------|---------|---------|---------|---------------------------------|
|                                                                             | Rate (%)                 | Rate (%)                 | Rate (%)         | 2012                                              | 2013    | 2014    | 2015    | 2016    | 2017    |                                 |
| Running                                                                     | 15.40%                   | 15.20%                   | 15.32%           | 7026986                                           | 7073363 | 7129484 | 7186880 | 7243553 | 7282198 | 42942464                        |
| Fitness class                                                               | 14.60%                   | 14.10%                   | 14.33%           | 6576041                                           | 6619442 | 6671962 | 6725675 | 6778710 | 6814876 | 40186707                        |
| Gym session                                                                 | 12.00%                   | 13.50%                   | 12.76%           | 5854110                                           | 5892746 | 5939500 | 5987316 | 6034529 | 6066724 | 35774925                        |
| Swimming                                                                    | 10.20%                   | 10.50%                   | 10.37%           | 4756421                                           | 4787813 | 4825800 | 4864650 | 4903011 | 4929169 | 29066865                        |
| Exercise machines                                                           | 8.40%                    | 8.80%                    | 8.59%            | 3940559                                           | 3966566 | 3998037 | 4030223 | 4062004 | 4083675 | 24081064                        |
| Hill and mountain walking                                                   | **                       | 6.30%                    | 6.25%            | 2867564                                           | 2886489 | 2909391 | 2932813 | 2955940 | 2971710 | 17523907                        |
| Weights session                                                             | 4.60%                    | 5.60%                    | 5.13%            | 2355853                                           | 2371402 | 2390217 | 2409459 | 2428459 | 2441415 | 14396805                        |
| Interval sessions                                                           | 5.40%                    | 4.70%                    | 5.10%            | 2338867                                           | 2354303 | 2372983 | 2392086 | 2410949 | 2423812 | 14292999                        |
| Football                                                                    | 5.00%                    | 4.50%                    | 4.76%            | 2183745                                           | 2198157 | 2215598 | 2233435 | 2251046 | 2263056 | 13345038                        |
| Generic fitness training                                                    | 4.40%                    | 4.20%                    | 4.29%            | 1968897                                           | 1981892 | 1997616 | 2013698 | 2029577 | 2040405 | 12032086                        |
| Golf                                                                        | 2.20%                    | 2.10%                    | 2.14%            | 981864                                            | 988344  | 996186  | 1004206 | 1012125 | 1017524 | 6000250                         |
| Badminton                                                                   | 2.00%                    | 1.90%                    | 1.92%            | 881734                                            | 887553  | 894595  | 901797  | 908908  | 913757  | 5388343                         |
| Tennis                                                                      | 1.90%                    | 1.70%                    | 1.83%            | 839447                                            | 844987  | 851691  | 858548  | 865318  | 869935  | 5129927                         |
| Boxing (inclusive of boxing fitness classes)                                | 1.70%                    | 1.70%                    | 1.65%            | 759328                                            | 764340  | 770404  | 776606  | 782730  | 786906  | 4640314                         |
| Rowing (inclusive of indoor rowing)                                         | 1.60%                    | 1.40%                    | 1.48%            | 680907                                            | 685401  | 690839  | 696401  | 701892  | 705637  | 4161076                         |
| Table Tennis                                                                | 1.00%                    | 0.90%                    | 0.95%            | 435916                                            | 438793  | 442274  | 445835  | 449351  | 451748  | 2663917                         |
| Squash                                                                      | 0.80%                    | 0.80%                    | 0.77%            | 351139                                            | 353456  | 356261  | 359129  | 361961  | 363892  | 2145838                         |
| Bowls                                                                       | 0.80%                    | 0.70%                    | 0.75%            | 341830                                            | 344086  | 346816  | 349608  | 352365  | 354245  | 2088948                         |
| Climbing and bouldering                                                     | **                       | 0.70%                    | 0.70%            | 321167                                            | 323287  | 325852  | 328475  | 331065  | 332832  | 1962678                         |
| Basketball                                                                  | 0.70%                    | 0.70%                    | 0.67%            | 307403                                            | 309432  | 311887  | 314398  | 316877  | 318567  | 1878563                         |
| Cricket                                                                     | 0.70%                    | 0.70%                    | 0.66%            | 302879                                            | 304878  | 307297  | 309771  | 312213  | 313879  | 1850916                         |
| Equestrian                                                                  | 0.70%                    | 0.60%                    | 0.65%            | 299278                                            | 301253  | 303644  | 306088  | 308502  | 310148  | 1828913                         |
| Gymnastics (excluding trampolining)                                         | 0.70%                    | 0.60%                    | 0.65%            | 299546                                            | 301523  | 303915  | 306362  | 308777  | 310425  | 1830547                         |
| Gymnastics (inclusive of all trampolining)                                  |                          |                          | 0.65%            | 299546                                            | 301523  | 303915  | 302003  | 308777  | 310425  | 1830547                         |
| Gymnastics (inclusive of institutional (i.e., non-home based) trampolining) |                          |                          | 0.65%            | 299546                                            | 301523  | 303915  | 302003  | 308777  | 310425  | 1830547                         |

|                                                     |       |       |       |        |        |        |        |        |        |         |
|-----------------------------------------------------|-------|-------|-------|--------|--------|--------|--------|--------|--------|---------|
| Netball                                             | 0.60% | 0.60% | 0.62% | 284523 | 286401 | 288673 | 290997 | 293292 | 294857 | 1738744 |
| Fell running                                        | 0.50% | 0.70% | 0.62% | 286309 | 288199 | 290485 | 292824 | 295133 | 296707 | 1749657 |
| Snowsport                                           | 0.50% | 0.60% | 0.55% | 252434 | 254100 | 256116 | 258178 | 260213 | 261602 | 1542641 |
| Rugby Union                                         | 0.60% | 0.50% | 0.53% | 243522 | 245129 | 247074 | 249063 | 251027 | 252366 | 1488180 |
| Martial Arts                                        | 0.50% | 0.60% | 0.52% | 239940 | 241523 | 243439 | 245399 | 247334 | 248654 | 1466289 |
| Track and field athletics                           | 0.50% | 0.40% | 0.50% | 227164 | 228663 | 230477 | 232333 | 234165 | 235414 | 1388216 |
| Garden trampolining                                 | 0.40% | 0.50% | 0.46% | 209460 | 210843 | 212516 | 214226 | 215916 | 217068 | 1280028 |
| Canoeing                                            | 0.30% | 0.40% | 0.35% | 161109 | 162172 | 163459 | 164775 | 166074 | 166960 | 984548  |
| Surfing, board surfing, body boarding, kite surfing | 0.20% | 0.30% | 0.30% | 137043 | 137948 | 139042 | 140161 | 141267 | 142020 | 837481  |
| Sailing                                             | 0.30% | 0.30% | 0.28% | 129796 | 130652 | 131689 | 132749 | 133796 | 134510 | 793192  |
| Hockey                                              | 0.20% | 0.20% | 0.24% | 110114 | 110841 | 111721 | 112620 | 113508 | 114114 | 672918  |
| Angling                                             | 0.20% | 0.20% | 0.24% | 107863 | 108575 | 109436 | 110317 | 111187 | 111780 | 659158  |
| Parkour or free running                             | 0.20% | 0.20% | 0.22% | 100938 | 101604 | 102411 | 103235 | 104049 | 104604 | 616842  |
| Tai Chi                                             | 0.20% | 0.20% | 0.21% | 97298  | 97941  | 98718  | 99512  | 100297 | 100832 | 594598  |
| Shooting                                            | 0.20% | 0.20% | 0.20% | 91762  | 92368  | 93101  | 93850  | 94590  | 95095  | 560765  |
| Rounders                                            | 0.20% | 0.20% | 0.18% | 80395  | 80925  | 81567  | 82224  | 82872  | 83315  | 491298  |
| Rugby League                                        | 0.20% | 0.10% | 0.17% | 77102  | 77611  | 78226  | 78856  | 79478  | 79902  | 471175  |
| Volleyball                                          | 0.20% | 0.20% | 0.17% | 75798  | 76298  | 76903  | 77522  | 78134  | 78551  | 463205  |
| Frisbee or ultimate frisbee                         | 0.10% | 0.20% | 0.14% | 62694  | 63108  | 63609  | 64121  | 64626  | 64971  | 383129  |
| Skateboarding                                       | 0.10% | 0.20% | 0.14% | 65475  | 65907  | 66430  | 66964  | 67492  | 67853  | 400121  |
| Dodgeball                                           | 0.10% | 0.10% | 0.13% | 57462  | 57841  | 58300  | 58769  | 59232  | 59548  | 351152  |
| Ice skating                                         | 0.10% | 0.10% | 0.13% | 58252  | 58637  | 59102  | 59578  | 60047  | 60368  | 355983  |
| Scuba diving or snorkelling                         | 0.10% | 0.10% | 0.12% | 53491  | 53844  | 54272  | 54709  | 55140  | 55434  | 326890  |
| Orienteering                                        | 0.10% | 0.10% | 0.10% | 43733  | 44021  | 44371  | 44728  | 45081  | 45321  | 267254  |
| Roller-skating, inline skating, rollerblading       | 0.10% | 0.10% | 0.10% | 43672  | 43961  | 44309  | 44666  | 45018  | 45258  | 266885  |
| Taekwondo                                           | 0.10% | 0.10% | 0.09% | 43298  | 43584  | 43930  | 44284  | 44633  | 44871  | 264600  |
| Archery                                             | 0.10% | 0.10% | 0.08% | 35856  | 36093  | 36379  | 36672  | 36961  | 37158  | 219120  |
| Handball                                            | 0.10% | 0.10% | 0.06% | 25253  | 25420  | 25621  | 25828  | 26031  | 26170  | 154324  |
| Life-saving                                         | 0.10% | 0.10% | 0.06% | 27529  | 27710  | 27930  | 28155  | 28377  | 28528  | 168230  |
| Snooker                                             | 0.10% | 0.10% | 0.06% | 25330  | 25497  | 25699  | 25906  | 26110  | 26250  | 154792  |
| Judo                                                | 0.10% | 0.00% | 0.06% | 26860  | 27037  | 27251  | 27471  | 27688  | 27835  | 164142  |

|                                                                       |       |       |       |       |       |       |       |       |       |        |
|-----------------------------------------------------------------------|-------|-------|-------|-------|-------|-------|-------|-------|-------|--------|
| Wrestling                                                             | 0.10% | 0.10% | 0.06% | 27529 | 27710 | 27930 | 28155 | 28377 | 28528 | 168230 |
| Baseball or Softball                                                  | 0.10% | 0.00% | 0.05% | 20819 | 20957 | 21123 | 21293 | 21461 | 21576 | 127230 |
| Fencing                                                               | 0.10% | 0.00% | 0.05% | 23917 | 24075 | 24266 | 24461 | 24654 | 24785 | 146157 |
| Sledding, luge, tobogganing                                           | *     | 0.10% | 0.05% | 22941 | 23092 | 23275 | 23463 | 23648 | 23774 | 140191 |
| Sledding, luge, tobogganing (excluding hill or park-based activities) |       |       | 0.05% | 22941 | 23092 | 23275 | 23129 | 23648 | 23774 | 139857 |
| Triathlon                                                             | 0.10% | 0.10% | 0.05% | 22941 | 23092 | 23275 | 23463 | 23648 | 23774 | 140191 |
| Cheerleading                                                          | 0.00% | 0.10% | 0.05% | 20960 | 21098 | 21265 | 21436 | 21605 | 21721 | 128085 |
| Lacrosse                                                              | *     | 0.00% | 0.04% | 18352 | 18474 | 18620 | 18770 | 18918 | 19019 | 112153 |
| Croquet                                                               | 0.00% | 0.10% | 0.04% | 19674 | 19803 | 19961 | 20121 | 20280 | 20388 | 120227 |
| Obstacle course                                                       | 0.00% | 0.00% | 0.04% | 16335 | 16443 | 16574 | 16707 | 16839 | 16929 | 99827  |
| Motor sports                                                          | 0.00% | 0.00% | 0.04% | 18352 | 18474 | 18620 | 18770 | 18918 | 19019 | 112153 |
| Water-skiing                                                          | 0.00% | 0.00% | 0.03% | 15474 | 15576 | 15699 | 15826 | 15950 | 16036 | 94560  |
| Ten-pin bowling                                                       | 0.00% | 0.00% | 0.03% | 13764 | 13855 | 13965 | 14078 | 14189 | 14264 | 84115  |
| Pool                                                                  | 0.00% | 0.00% | 0.03% | 12041 | 12121 | 12217 | 12315 | 12412 | 12479 | 73585  |
| Darts                                                                 | 0.00% | 0.00% | 0.03% | 11860 | 11938 | 12033 | 12130 | 12225 | 12291 | 72476  |
| Ice hockey                                                            | 0.00% | 0.00% | 0.03% | 11830 | 11908 | 12002 | 12099 | 12194 | 12259 | 72291  |
| Caving or pot holing                                                  | 0.00% | 0.00% | 0.02% | 9176  | 9237  | 9310  | 9385  | 9459  | 9509  | 56077  |
| Abseiling                                                             | *     | 0.00% | 0.02% | 9176  | 9237  | 9310  | 9385  | 9459  | 9509  | 56077  |
| Gliding, paragliding or hang gliding                                  | 0.00% | *     | 0.02% | 9176  | 9237  | 9310  | 9385  | 9459  | 9509  | 56077  |
| Skittles                                                              | 0.00% | 0.00% | 0.02% | 7283  | 7331  | 7389  | 7448  | 7507  | 7547  | 44505  |
| Boules, petanque, deck bowls                                          | 0.00% | 0.00% | 0.02% | 9176  | 9237  | 9310  | 9385  | 9459  | 9509  | 56077  |
| Wheelchair Rugby                                                      | *     | *     |       |       |       |       |       |       |       |        |
| Wheelchair Basketball                                                 | *     | *     |       |       |       |       |       |       |       |        |
| Goalball                                                              | *     | *     |       |       |       |       |       |       |       |        |
| High ropes                                                            | *     | *     |       |       |       |       |       |       |       |        |
| Modern Pentathlon                                                     | *     | *     |       |       |       |       |       |       |       |        |
| Boccia                                                                | *     | *     |       |       |       |       |       |       |       |        |

\* Result by sex is not provided in the interests of non-disclosure (results for one sex are <5 cases)

\*\* Denominator data are not available in Active Lives Survey (ALS). This is predominantly due to insufficient data (i.e., too few participant responses by sex), to report an ALS result.
